# Supplementary material for: The Top 100 Most Cited Articles Published in Dentistry: 2020 Update
Source: Preprints.org preprint supplement (doi:10.20944/preprints202102.0022.v1), 2021-02-01
Supplement: Supplementary file 1 [file supplementary]

| **Sr No.** | **Article title** | **Citation count (ES)** | **Citation count (GS)** | **Citation density** | **CCI 2020** |
| --- | --- | --- | --- | --- | --- |
| 1 | Silness J, Löe H. Periodontal disease in pregnancy II. Correlation between oral hygiene and periodontal condition*. Acta Odontol Scand*. 1964;22:121-135. | 4728 | 8281 | 84 | 269 |
| 2 | Löe H, Silness J. Periodontal disease in pregnancy I. Prevalence and severity*. Acta Odontol Scand*. 1963;21:533-551. | 4062 | 7873 | 71 | 232 |
| 3 | Adell R, Lekholm U, Rockler B, Brånemark P-I. A 15-year study of osseointegrated implants in the treatment of the edentulous jaw*. Int J Oral Surg*. 1981;10:387-416. | 3392 | 6257 | 117 | 96 |
| 4 | Socransky S, Haffajee A, Cugini M, Smith C, Kent Jr R. Microbial complexes in subgingival plaque*. J Clin Periodontol*. 1998;25:134-144. | 2633 | 4683 | 120 | 217 |
| 5 | Birkedal-Hansen H, Moore W, Bodden M, Windsor L, Birkedal-Hansen B, DeCarlo A, Engler J. Matrix metalloproteinases: a review*. Crit Rev Oral Biol Med*. 1993;4:197-250. | 2529 | 3620 | 94 | 36 |
| 6 | Albrektsson T, Zarb G, Worthington P, Eriksson A. The long-term efficacy of currently used dental implants: a review and proposed criteria of success*. Int J Oral Maxillofac Implants*. 1986;1:11-25. | 2417 | 5233 | 71 | 115 |
| 7 | Löe H. The gingival index, the plaque index and the retention index systems*. J Periodontol*. 1967;38:610-616. | 2342 | 4136 | 44 | 168 |
| 8 | Löe H, Theilade E, Jensen SB. Experimental gingivitis in man*. J Periodontol*. 1965;36:177-187. | 1904 | 4376 | 35 | 80 |
| 9 | Marx RE, Carlson ER, Eichstaedt RM, Schimmele SR, Strauss JE, Georgeff KR. Platelet-rich plasma: growth factor enhancement for bone grafts*. Oral Surg Oral Med Oral Pathol Oral Radiol Endodontol*. 1998;85:638-646. | 1870 | 3663 | 85 | 111 |
| 10 | Guo Sa, DiPietro LA. Factors affecting wound healing*. J Dent Res*. 2010;89:219-229. | 1859 | 3384 | 186 | 345 |
| 11 | Marx RE. Pamidronate (Aredia) and zoledronate (Zometa) induced avascular necrosis of the jaws: a growing epidemic*. J Oral Maxillofac Surg*. 2003;61:1115-1117. | 1852 | 3249 | 109 | 107 |
| 12 | Ainamo J, Bay I. Problems and proposals for recording gingivitis and plaque*. Int Dent J*. 1975;25:229. | 1735 | 3066 | 38 | 160 |
| 13 | Warnakulasuriya S. Global epidemiology of oral and oropharyngeal cancer*. Oral Oncol*. 2009;45:309-316. | 1700 | 2841 | 155 | 234 |
| 14 | Adell R, Eriksson B, Lekholm U, Brånemark P-I, Jemt T. A long-term follow-up study of osseointegrated implants in the treatment of totally edentulous jaws*. Int J Oral Maxillofac Implants*. 1990;5. | 1661 | 2982 | 55 | 28 |
| 15 | Buonocore MG. A simple method of increasing the adhesion of acrylic filling materials to enamel surfaces*. J Dent Res*. 1955;34:849-853. | 1588 | 4476 | 24 | 45 |
| 16 | Le Guéhennec L, Soueidan A, Layrolle P, Amouriq Y. Surface treatments of titanium dental implants for rapid osseointegration*. Dent Mater*. 2007;23:844-854. | 1560 | 2426 | 120 | 148 |
| 17 | Ruggiero SL, Mehrotra B, Rosenberg TJ, Engroff SL. Osteonecrosis of the jaws associated with the use of bisphosphonates: a review of 63 cases*. J Oral Maxillofac Surg*. 2004;62:527-534. | 1509 | 2555 | 94 | 40 |
| 18 | Donath K, Breuner G. A method for the study of undecalcified bones and teeth with attached soft tissues* The Säge‐Schliff (sawing and grinding) Technique*. J Oral Pathol Med*. 1982;11:318-326. | 1480 | 2040 | 39 | 44 |
| 19 | O'Leary TJ, Drake RB, Naylor JE. The plaque control record*. J Periodontol*. 1972;43:38-38. | 1371 | 2431 | 29 | 150 |
| 20 | Slade GD, Spencer AJ. Development and evaluation of the oral health impact profile*. Commun Dent Health*. 1994;11:3. | 1353 | 2620 | 52 | 127 |
| 21 | Gronthos S, Brahim J, Li W, Fisher L, Cherman N, Boyde A, DenBesten P, Robey PG, Shi S. Stem cell properties of human dental pulp stem cells*. J Dent Res*. 2002;81:531-535. | 1299 | 2305 | 72 | 90 |
| 22 | Van Meerbeek B, De Munck J, Yoshida Y, Inoue S, Vargas M, Vijay P, Van Landuyt K, Lambrechts P, Vanherle G. Buonocore memorial lecture. Adhesion to enamel and dentin: current status and future challenges*. Oper Dent*. 2003;28:215-35. | 1294 | 2641 | 76 | 69 |
| 23 | Petersen PE. The World Oral Health Report 2003: continuous improvement of oral health in the 21st century–the approach of the WHO Global Oral Health Programme*. Commun Dent Oral Epidemiol*. 2003;31:3-24. | 1291 | 3873 | 76 | 126 |
| 24 | Moorrees CF, Fanning EA, Hunt Jr EE. Age variation of formation stages for ten permanent teeth*. J Dent Res*. 1963;42:1490-1502. | 1245 | 2404 | 22 | 66 |
| 25 | Marx RE. Platelet-rich plasma: evidence to support its use*. J Oral Maxillofac Surg*. 2004;62:489-496. | 1196 | 2374 | 75 | 89 |
| 26 | De Munck Jd, Van Landuyt K, Peumans M, Poitevin A, Lambrechts P, Braem M, Van Meerbeek B. A critical review of the durability of adhesion to tooth tissue: methods and results*. J Dent Res*. 2005;84:118-132. | 1196 | 2409 | 82 | 73 |
| 27 | Branemark P-I. Osseointegration and its experimental background*. J Prosthet Dent*. 1983;50:399-410. | 1188 | 2737 | 32 | 65 |
| 28 | Marx RE, Sawatari Y, Fortin M, Broumand V. Bisphosphonate-induced exposed bone (osteonecrosis/osteopetrosis) of the jaws: risk factors, recognition, prevention, and treatment*. J Oral Maxillofac Surg*. 2005;63:1567-1575. | 1166 | 2039 | 78 | 46 |
| 29 | Slade GD. Derivation and validation of a short‐form oral health impact profile*. Commun Dent Oral Epidemiol*. 1997;25:284-290. | 1165 | 2311 | 51 | 163 |
| 30 | Greene JG, Vermillion JR. The simplified oral hygiene index*. J Am Dent Assoc*. 1964;68:7-13. | 1162 | 2723 | 21 | 120 |
| 31 | Huang G-J, Gronthos S, Shi S. Mesenchymal stem cells derived from dental tissues vs. those from other sources: their biology and role in regenerative medicine*. J Dent Res*. 2009;88:792-806. | 1034 | 1721 | 94 | 98 |
| 32 | Haffajee AD. Microbial etiological agents of destructive periodontal diseases*. Periodontol 2000*. 1994;5:78-111. | 1132 | 2307 | 44 | 31 |
| 33 | Denry I, Kelly JR. State of the art of zirconia for dental applications*. Dent Mater*. 2008;24:299-307. | 1132 | 2066 | 94 | 160 |
| 34 | Houston W. The analysis of errors in orthodontic measurements*. Am J Orthod*. 1983;83:382-390. | 1116 | 2055 | 30 | 49 |
| 35 | Schiffman E, Ohrbach R, Truelove E, Look J, Anderson G, Goulet J-P, List T, Svensson P. Diagnostic criteria for temporomandibular disorders (DC/TMD) for clinical and research applications: recommendations of the International RDC/TMD Consortium Network and Orofacial Pain Special Interest Group*. J Oral Fac Pain Headache*. 2014;28:6. | 1087 | 1772 | 181 | 299 |
| 36 | Schropp L, Wenzel A, Kostopoulos L, Karring T. Bone healing and soft tissue contour changes following single-tooth extraction: a clinical and radiographic 12-month prospective study*. Int J Periodont Restor Dent*. 2003;23. | 1019 | 2149 | 60 | 96 |
| 37 | Beck J, Garcia R, Heiss G, Vokonas PS, Offenbacher S. Periodontal disease and cardiovascular disease*. J Periodontol*. 1996;67:1123-1137. | 1016 | 2008 | 42 | 37 |
| 38 | Ruggiero SL, Dodson TB, Fantasia J, Goodday R, Aghaloo T, Mehrotra B, O'Ryan F. American Association of Oral and Maxillofacial Surgeons position paper on medication-related osteonecrosis of the jaw— 2014 update*. J Oral Maxillofac Surg*. 2014;72:1938-1956. | 1001 | 1509 | 167 | 244 |
| 39 | Turesky S, Gilmore ND, Glickman I. Reduced plaque formation by the chloromethyl analogue of victamine C*. J Periodontol*. 1970;41:41-43. | 997 | 1512 | 20 | 57 |
| 40 | Humphrey SP, Williamson RT. A review of saliva: normal composition, flow, and function*. J Prosthet Dent*. 2001;85:162-169. | 989 | 1897 | 52 | 149 |
| 41 | Araújo MG, Lindhe J. Dimensional ridge alterations following tooth extraction. An experimental study in the dog*. J Clin Periodontol*. 2005;32:212-218. | 980 | 2051 | 65 | 105 |
| 42 | Buser D, Mericske‐stern R, Pierre Bernard JP, Behneke A, Behneke N, Hirt HP, Belser UC, Lang NP. Long‐term evaluation of non‐submerged ITI implants. Part 1: 8‐year life table analysis of a prospective multi‐center study with 2359 implants*. Clin Oral Implants Res*. 1997;8:161-172. | 952 | 1865 | 41 | 26 |
| 43 | Zehnder M. Root canal irrigants*. J Endod*. 2006;32:389-398. | 938 | 2101 | 67 | 114 |
| 44 | Socransky SS, Haffajee AD. Periodontal microbial ecology*. Periodontol 2000*. 2005;38:135-187. | 935 | 1822 | 62 | 79 |
| 45 | Feilzer A, De Gee A, Davidson C. Setting stress in composite resin in relation to configuration of the restoration*. J Dent Res*. 1987;66:1636-1639. | 931 | 1642 | 28 | 23 |
| 46 | Eke PI, Dye B, Wei L, Thornton-Evans G, Genco R. Prevalence of periodontitis in adults in the United States: 2009 and 2010*. J Dent Res*. 2012;91:914-920. | 930 | 1611 | 116 | 109 |
| 47 | Kornman KS, Crane A, Wang HY, Giovlne FSd, Newman MG, Pirk FW, Wilson Jr TG, Higginbottom FL, Duff GW. The interleukin‐1 genotype as a severity factor in adult periodontal disease*. J Clin Periodontol*. 1997;24:72-77. | 896 | 1585 | 39 | 20 |
| 48 | Sjögren U, Hägglund B, Sundqvist G, Wing K. Factors affecting the long-term results of endodontic treatment*. J Endod*. 1990;16:498-504. | 918 | 2191 | 31 | 63 |
| 49 | Ferracane JL. Resin composite—state of the art*. Dent Mater*. 2011;27:29-38. | 918 | 1838 | 102 | 138 |
| 50 | Cawood J, Howell R. A classification of the edentulous jaws*. Int J Oral Maxillofac Surg*. 1988;17:232-236. | 898 | 1581 | 28 | 55 |
| 51 | Sundqvist G, Figdor D, Persson S, Sjögren U. Microbiologic analysis of teeth with failed endodontic treatment and the outcome of conservative re-treatment*. Oral Surgery, Oral Medicine, Oral Pathol Oral Radiol Endodontol*. 1998;85:86-93. | 869 | 1971 | 40 | 36 |
| 52 | Eriksson A, Albrektsson T. Temperature threshold levels for heat-induced bone tissue injury: a vital-microscopic study in the rabbit*. J Prosthet Dent*. 1983;50:101-107. | 864 | 1505 | 23 | 56 |
| 53 | Esposito M, Hirsch J-M, Lekholm U, Thomsen P. Biological factors contributing to failures of osseointegrated oral implants.(II). Etiopathogenesis*. Eur J Oral Sci*. 1998;106:721. | 861 | 1617 | 39 | 33 |
| 54 | Buser D, Broggini N, Wieland M, Schenk R, Denzer A, Cochran D, Hoffmann B, Lussi A, Steinemann S. Enhanced bone apposition to a chemically modified SLA titanium surface*. J Dent Res*. 2004;83:529-533. | 860 | 1326 | 54 | 60 |
| 55 | Jaffin RA, Berman CL. The excessive loss of Branemark fixtures in type IV bone: a 5‐year analysis*. J Periodontol*. 1991;62:2-4. | 848 | 1585 | 29 | 22 |
| 56 | Offenbacher S, Katz V, Fertik G, Collins J, Boyd D, Maynor G, McKaig R, Beck J. Periodontal infection as a possible risk factor for preterm low birth weight*. J Periodontol*. 1996;67:1103-1113. | 846 | 2000 | 35 | 30 |
| 57 | Esposito M, Hirsch JM, Lekholm U, Thomsen P. Biological factors contributing to failures of osseointegrated oral implants,(I). Success criteria and epidemiology*. Eur J Oral Sci*. 1998;106:527-551. | 841 | 1591 | 38 | 35 |
| 58 | Page RC, Eke PI. Case definitions for use in population‐based surveillance of periodontitis*. J Periodontol*. 2007;78:1387-1399. | 835 | 1301 | 64 | 94 |
| 59 | Sodek J, Ganss B, McKee M. Osteopontin*. Crit Rev Oral Biol Med*. 2000;11:279-303. | 832 | 1262 | 42 | 35 |
| 60 | Wennerberg A, Albrektsson T. Effects of titanium surface topography on bone integration: a systematic review*. Clin Oral Implants Res*. 2009;20:172-184. | 831 | 1289 | 76 | 81 |
| 61 | Torabinejad M, Hong C, McDonald F, Ford TP. Physical and chemical properties of a new root-end filling material*. J Endod*. 1995;21:349-353. | 829 | 2013 | 33 | 48 |
| 62 | Ainamo J. Development of the World Health Organization (WHO) community periodontal index of treatment needs (CPITN)*. Int Dent J* 1982;32:281-291. | 825 | 1694 | 22 | 38 |
| 63 | Ruggiero SL, Dodson TB, Assael LA, Landesberg R, Marx RE, Mehrotra B. American Association of Oral and Maxillofacial Surgeons position paper on bisphosphonate-related osteonecrosis of the jaws—2009 update*. J Oral Maxillofac Surg*. 2009;67:2-12. | 822 | 1206 | 75 | 42 |
| 64 | Marx RE. Platelet-rich plasma (PRP): what is PRP and what is not PRP? *Implant Dent*. 2001;10:225-228. | 818 | 1780 | 43 | 71 |
| 65 | Lindhe J, Meyle J, [Berglundh](https://pubmed.ncbi.nlm.nih.gov/?term=Berglundh+T) T, [Claffey](https://pubmed.ncbi.nlm.nih.gov/?term=Claffey+N) N, [De Bruyn](https://pubmed.ncbi.nlm.nih.gov/?term=De+Bruyn+H) H, [Heitz-Mayfield](https://pubmed.ncbi.nlm.nih.gov/?term=Heitz-Mayfield+N) N, [Karoussis](https://pubmed.ncbi.nlm.nih.gov/?term=Karoussis+I) I, [Könönen](https://pubmed.ncbi.nlm.nih.gov/?term=K%C3%B6n%C3%B6nen+E) E, [Mombelli](https://pubmed.ncbi.nlm.nih.gov/?term=Mombelli+A) A, [Renvert](https://pubmed.ncbi.nlm.nih.gov/?term=Renvert+S) S, [van Winkelhoff](https://pubmed.ncbi.nlm.nih.gov/?term=van+Winkelhoff+A) A, [Winkel](https://pubmed.ncbi.nlm.nih.gov/?term=Winkel+E) E, [Zitzmann](https://pubmed.ncbi.nlm.nih.gov/?term=Zitzmann+N) N. Peri‐implant diseases: consensus report of the sixth European workshop on periodontology*. J Clin Periodontol*. 2008;35:282-285. | 812 | 1600 | 68 | 99 |
| 66 | Bollenl CM, Lambrechts P, Quirynen M. Comparison of surface roughness of oral hard materials to the threshold surface roughness for bacterial plaque retention: a review of the literature*. Dent Mater*. 1997;13:258-269. | 811 | 1497 | 35 | 99 |
| 67 | Socransky SS, Haffajee AD. The bacterial etiology of destructive periodontal disease: current concepts*. J Periodontol*. 1992;63:322-331. | 806 | 1685 | 29 | 18 |
| 68 | Locker D. Measuring oral health: a conceptual framework*. Commun Dent Health*. 1988;5:3-18. | 782 | 1595 | 24 | 71 |
| 69 | Grossi SG, Zambon JJ, Ho AW, Koch G, Dunford RG, Machtei EE, Norderyd OM, Genco RJ. Assessment of risk for periodontal disease. I. Risk indicators for attachment loss*. J Periodontol*. 1994;65:260-267. | 769 | 1572 | 30 | 20 |
| 70 | Manicone PF, Iommetti PR, Raffaelli L. An overview of zirconia ceramics: basic properties and clinical applications*. J Dent*. 2007;35:819-826. | 768 | 1447 | 59 | 80 |
| 71 | Scarfe WC, Farman AG, Sukovic P. Clinical applications of cone-beam computed tomography in dental practice*. J Can Dent Assoc*. 2006;72:75. | 761 | 1948 | 54 | 64 |
| 72 | Gold OG, Jordan H, Van Houte J. A selective medium for Streptococcus mutans*. Arch Oral Biol*. 1973;18:1357-1364. | 759 | 1218 | 16 | 13 |
| 73 | Nyman S, Lindhe J, Karring T, Rylander H. New attachment following surgical treatment of human periodontal disease*. J clin periodontol*. 1982;9:290-296. | 757 | 1662 | 20 | 16 |
| 74 | Marx RE. Osteoradionecrosis: a new concept of its pathophysiology*. J Oral Maxillofac Surg*. 1983;41:283-288. | 756 | 1251 | 20 | 54 |
| 75 | Warnakulasuriya S, Johnson NW, Van der Waal I. Nomenclature and classification of potentially malignant disorders of the oral mucosa*. J Oral Pathol Med*. 2007;36:575-580. | 754 | 1482 | 58 | 93 |
| 76 | Haraszthy V, Zambon J, Trevisan M, Zeid M, Genco R. Identification of periodontal pathogens in atheromatous plaques*. J Periodontol*. 2000;71:1554-1560. | 752 | 1408 | 38 | 30 |
| 77 | Moore W, Moore LV. The bacteria of periodontal diseases*. Periodontol 2000*. 1994;5:66-77. | 751 | 1405 | 29 | 28 |
| 78 | Corah NL. Development of a dental anxiety scale*. J Dent Res*. 1969;48:596-596. | 747 | 1626 | 15 | 26 |
| 79 | Dohan DM, Choukroun J, Diss A, Dohan SL, Dohan AJ, Mouhyi J, Gogly B. Platelet-rich fibrin (PRF): a second-generation platelet concentrate. Part I: technological concepts and evolution*. Oral Surg Oral Med Oral Pathol Oral Radiol Endodontol*. 2006;101:e37-e44. | 747 | 1605 | 53 | 119 |
| 80 | Breschi L, Mazzoni A, Ruggeri A, Cadenaro M, Di Lenarda R, Dorigo EDS. Dental adhesion review: aging and stability of the bonded interface*. Dent Mater*. 2008;24:90-101. | 746 | 1413 | 62 | 65 |
| 81 | Yoshida Y, Nagakane K, Fukuda R, Nakayama Y, Okazaki M, Shintani H, Inoue S, Tagawa Y, Suzuki K, De Munck J. Comparative study on adhesive performance of functional monomers*. J Dent Res*. 2004;83:454-458. | 745 | 1246 | 47 | 58 |
| 82 | Årtun J, Bergland S. Clinical trials with crystal growth conditioning as an alternative to acid-etch enamel pretreatment*. Am J Orthod*. 1984;85:333-340. | 738 | 1311 | 21 | 58 |
| 83 | Sjögren U, Figdor D, Persson S, Sundqvist G. Influence of infection at the time of root filling on the outcome of endodontic treatment of teeth with apical periodontitis*. Int Endod J*. 1997;30:297-306. | 737 | 1613 | 32 | 35 |
| 84 | Quigley GA, Hein JW. Comparative cleansing efficiency of manual and power brushing*. J Am Dent Assoc*. 1962;65:26-29. | 737 | 1216 | 13 | 33 |
| 85 | Ferracane JL. Hygroscopic and hydrolytic effects in dental polymer networks*. Dent Mater*. 2006;22:211-222. | 732 | 1263 | 52 | 79 |
| 86 | Torabinejad M, Chivian N. Clinical applications of mineral trioxide aggregate*. J Endod*. 1999;25:197-205. | 731 | 1818 | 35 | 33 |
| 87 | Van Meerbeek B, Yoshihara K, Yoshida Y, Mine A, De Munck J, Van Landuyt K. State of the art of self-etch adhesives*. Dent Mater*. 2011;27:17-28. | 703 | 1282 | 78 | 106 |
| 88 | Albrektsson T, Wennerberg A. Oral implant surfaces: Part 1--review focusing on topographic and chemical properties of different surfaces and in vivo responses to them*. Int J Prosthod*. 2004;17. | 700 | 1156 | 44 | 44 |
| 89 | Berglundh T, Persson L, Klinge B. A systematic review of the incidence of biological and technical complications in implant dentistry reported in prospective longitudinal studies of at least 5 years*. J Clin Periodontol*. 2002;29:197-212. | 698 | 1331 | 39 | 40 |
| 90 | Zitzmann NU, Berglundh T. Definition and prevalence of peri‐implant diseases*. J Clin Periodontol*. 2008;35:286-291. | 689 | 1355 | 57 | 59 |
| 91 | Peters OA. Current challenges and concepts in the preparation of root canal systems: a review*. J Endod*. 2004;30:559-567. | 683 | 1564 | 43 | 64 |
| 92 | Socransky SS. Dental biofilms: difficult therapeutic targets*. Periodontol 2000*. 2002;28:12-55. | 682 | 1475 | 38 | 48 |
| 93 | Pashley DH, Tay F, Yiu C, Hashimoto M, Breschi L, Carvalho R, Ito S. Collagen degradation by host-derived enzymes during aging*. J Dent Res*. 2004;83:216-221. | 679 | 1158 | 42 | 42 |
| 94 | Quirynen M, Bollen C. The influence of surface roughness and surface‐free energy on supra‐and subgingival plaque formation in man: A review of the literature*. J Clin Periodontol*. 1995;22:1-14. | 669 | 1206 | 27 | 60 |
| 95 | Davies JE. Understanding peri‐implant endosseous healing*. J Dent Edu*. 2003;67:932-949. | 667 | 1209 | 39 | 43 |
| 96 | Advisory T. American Association of Oral and Maxillofacial Surgeons position paper on bisphosphonate-related osteonecrosis of the jaws*. J Oral Maxillofac Surg*. 2007;65:369-376. | 668 | 138 | 51 | 14 |
| 97 | Davidson C, De Gee A, Feilzer A. The competition between the composite-dentin bond strength and the polymerization contraction stress*. J Dent Res*. 1984;63:1396-1399. | 660 | 1200 | 18 | 12 |
| 98 | Johnston W, Kao E. Assessment of appearance match by visual observation and clinical colorimetry*. J Dent Res*. 1989;68:819-822. | 652 | 1216 | 21 | 34 |
| 99 | Zambon JJ. Actinobacillus actinomycetemcomitans in human periodontal disease*. J Clin Periodontol*. 1985;12:1-20. | 649 | 1030 | 19 | 10 |
| 100 | Slots J, Genco RJ. Black-pigmented Bacteroides species, Capnocytophaga species, and Actinobacillus actinomycetemcomitans in human periodontal disease: virulence factors in colonization, survival, and tissue destruction*. J Dent Res.* 1984;63:412-421. | 638 | 1010 | 18 | 4 |
